# Supplementary material
Source: PubMed Central journal article supplement (PMC4188150)
Supplement: chest_146_4_941_ds01.pdf [file chest_146_4_941_ds01.pdf]

## Prediction of Acute Respiratory Disease in Current and Former Smokers With and Without COPD

*Russell P. Bowler, MD, PhD; Victor Kim, MD; Elizabeth Regan, MD; André A. A. Williams, PhD; Stephanie A. Santorico, PhD; Barry J. Make, MD, FCCP; David A. Lynch, MD; John E. Hokanson, PhD; George R. Washko, MD; Peter Bercz, MD; Xavier Soler, MD; Nathaniel Marchetti, MD, FCCP; Gerard J. Criner, MD, FCCP; Joe Ramsdell, MD, FCCP; MeiLan K. Han, MD; Dawn Demeo, MD; Antonio Anzueto, MD; Alejandro Comellas, MD; James D. Crapo, MD, FCCP; Mark Dransfield, MD; J. Michael Wells, MD; Craig P. Hersh, MD; Neil MacIntyre, MD, FCCP; Fernando Martinez, MD, FCCP; Hrudaya P. Nath, MD, FCCP; Dennis Niewoehner, MD, FCCP; Frank Sciurba, MD, FCCP; Amir Sharafkhaneh, MD, FCCP; Edwin K. Silverman, MD, PhD; Edwin J. R. van Beek, MD; Carla Wilson; Christine Wendt, MD; and Robert A. Wise, MD, FCCP; for the COPDGene investigators*

CHEST 2014;146(4):941-950

*Online supplements are not copyedited prior to posting.*

## e-Appendix 1.

### Supplemental Methods

#### Random Forests Methodology

Random survival forests were used to analyze the data with time to severe episodes as the outcome of interest. One hundred and forty two variables were considered in the analysis. Each forest contained 500 trees. The log rank splitting rule was used to grow the trees. A Bootstrap resample of the data was used for each tree. Each resample contained approximately two thirds of the data. The other 'left out' or out of bag (OOB) samples were used to calculate the OOB error rate. The number of variables assessed, at each branch of a tree, was a random selection of  $p/2$  where  $p$  is the total number of variables. The splitting continues until a terminal node reaches a minimum number of 3 unique times to severe exacerbation. Missing data was not imputed. The analysis was performed separately for subjects with GOLD status 2 through 4; 0 and 1; and unclassified subjects. For each analysis the variable importance is reported.

#### Acute episodes of respiratory disease Score

Cox proportional hazards modeling multiple regression was used to identify parameter estimates ( $\hat{\beta}_i$ ) for the three major variables ( $x_i$ ) that were independently predictive of acute episodes of respiratory disease in the LFU period (SGRQ, FEV1%, prior acute episodes of respiratory disease). The entire dataset was used to calculate parameter estimates. The baseline survival function  $s(t)$  and the parameter estimates of each independent variable were used to estimate the probability that a subject will have an acute episodes of respiratory disease over a given time  $t$  (in years) for a subject  $j$  is  $P_j(t) = \frac{s(t)e^{\sum_{i=1}^N(\hat{\beta}_i * x_{ij})}}{s(t)e^{\sum_{i=1}^N(\hat{\beta}_i * x_{ij})} + 1}$ .

A preliminary score ( $S_p = \sum_{i=1}^N(\hat{\beta}_i * x_{ij})$ ) was transformed into a more intuitive exacerbation score by linear mapping onto a scale of 0-20. Each component score was rounded to a whole number.

---

#### Additional Statistical Methods

Several strategies were used to determine important variables that might be associated with acute episodes of respiratory disease including random forest analysis (**e-Table 1**), univariate regression modeling (**e-Table 2**), and risk factors identified in the literature. A visual inspection of the correlation matrix for all variables was used to determine collinearity among variables. When variables were highly collinear, we used the variable with the strongest univariate association. For multivariate modeling, the following covariates were used: demographics and physical characteristics (age, race, gender, BMI,

height); medical history (current versus former smoker, pack years, history of gastroesophageal reflux (GERD), years of smoke exposure at work, history of working at a dusty job, history of COPD in a parent, use of oxygen, history of congestive heart failure, history of blood clots); chronic bronchitis, exacerbations in the previous year, whether the 6-minute walk test was limited by dyspnea; physiology (FEV<sub>1</sub>% predicted and FEV<sub>1</sub>/FVC ratio post bronchodilator, bronchodilator reversibility as defined by the ATS and European Respiratory Society<sup>24</sup>, resting oxygen saturation, 6-minute walk distance); questionnaires (St. George's Respiratory Questionnaire (SGRQ) and Modified Medical Research Council (MMRC) dyspnea score); and imaging (emphysema, gas trapping, PA, Ao, and PA/Ao).

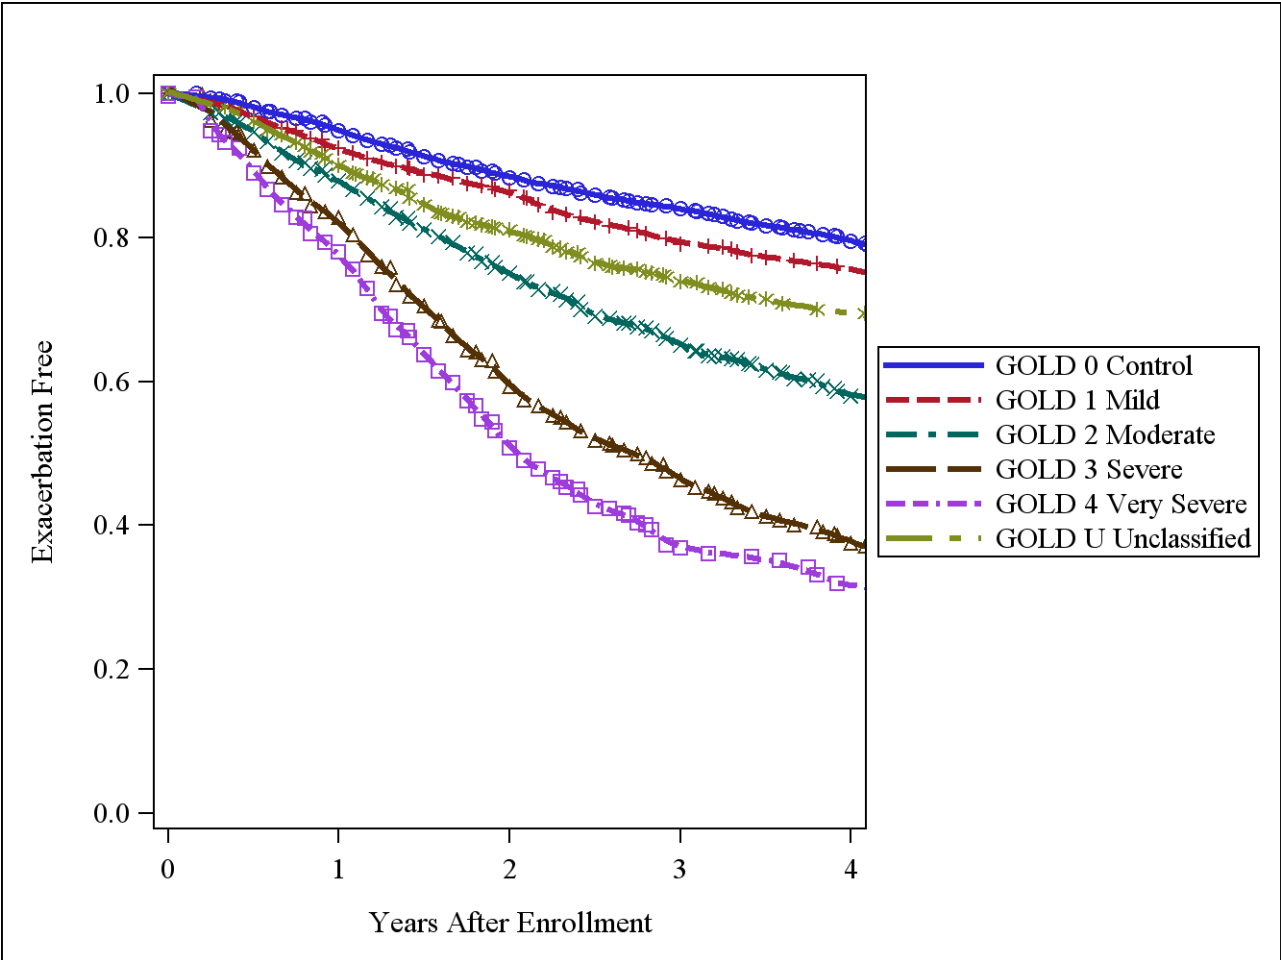

**e-Figure 1:** Fraction of subjects remaining episode free by GOLD stage

**e-Table 1: Random forest analysis of acute episodes of respiratory disease frequency**

| Variable Name                                | Variable importance | Variable Name                       | Variable importance | Variable Name                      | Variable importance |
|----------------------------------------------|---------------------|-------------------------------------|---------------------|------------------------------------|---------------------|
| Exacerbation in prior 12 month               | 1                   | bronchitis                          |                     | bronchiectasis on CT               |                     |
| History Bronchitis Attack                    | 0.22                | Tracheobronchomalacia on CT         | 0.011               | History of stomach ulcers          | -0.002              |
| Height (cm)                                  | 0.129               | Peripheral vascular disease         | 0.008               | Sleep apnea                        | -0.002              |
| History of Pneumonia                         | 0.106               | Mother with emphysema               | 0.008               | Back pain                          | -0.003              |
| SGRQ (symptom)                               | 0.094               | Other high concerns on Ct           | 0.007               | High blood pressure                | -0.003              |
| Self Reported Health Status (poor-excellent) | 0.065               | Total lung capacity on CT           | 0.007               | Father smoked cigarettes           | -0.003              |
| History of chronic bronchitis                | 0.06                | BODE                                | 0.006               | Gastroesophageal reflux            | -0.004              |
| Age at enrollment                            | 0.059               | Father with COPD                    | 0.006               | Functional residual capacity on CT | -0.005              |
| History of asthma                            | 0.053               | Concerns for ILD on CT              | 0.005               | CABG                               | -0.006              |
| Mosaic attenuation on CT                     | 0.046               | Mother smoked cigarettes            | 0.005               | Blood pressure (systolic)          | -0.006              |
| History of breast cancer                     | 0.041               | Race                                | 0.005               | Usually coughs up phlegm           | -0.007              |
| Distance walked in 6 min.                    | 0.041               | Honeycombing on CT                  | 0.004               | Concern for cancer on CT           | -0.007              |
| Pi15 (square root of WA)                     | 0.036               | History of colon cancer             | 0.004               | Mother with lung cancer            | -0.007              |
| History of COPD                              | 0.036               | Compression fractures in back       | 0.004               | Atelectasis on CT                  | -0.007              |
| Use oxygen                                   | 0.035               | Forced vital capacity               | 0.003               | Heart attack                       | -0.008              |
| Bronchial wall thickening on CT              | 0.033               | Wheezing or whistling in chest      | 0.003               | Change in FEV <sub>1</sub> post BD | -0.008              |
| Gender                                       | 0.029               | Angina                              | 0.003               | High cholesterol                   | -0.008              |
| Father with Emphysema                        | 0.028               | %change in FEV <sub>1</sub> post BD | 0.003               | DustyJobEver                       | -0.009              |
| History of pneumothorax                      | 0.019               | Mother with asthma                  | 0.002               | TIA                                | -0.009              |
| Diagnosis of emphysema                       | 0.018               | Gas trapping noted on CT            | 0.001               | Cancer of prostate                 | -0.009              |
| History of osteoporosis                      | 0.017               | History of blood clots              | 0.001               | ChestIllOther                      | -0.01               |
| Joint pain/stiffness limiting walking        | 0.016               | History of bladder cancer           | 0.001               | Cysts on CT                        | -0.01               |
| History allergic conjunctivitis              | 0.016               | History of congestive heart failure | 0.001               | Macular degeneration               | -0.01               |
| No high concerns on CT                       | 0.016               | Coronary artery disease             | 0.001               | Hay fever                          | -0.01               |
| History of stroke                            | 0.015               | History of hip fracture             | 0                   | ATS pack years                     | -0.01               |
| History of diabetes                          | 0.015               | Osteoarthritis                      | 0                   | ATS chronic bronchitis             | -0.012              |
| Bronchiectasis on CT                         | 0.015               | Ground glass on CT                  | 0                   | Consolidation on CT                | -0.013              |
| Blood Pressure (diastolic)                   | 0.015               | Noncalcified nodule CT              | 0                   | BD responsive (ATS)                | -0.014              |
| Usually has cough                            | 0.015               | History of rhinitis                 | -0.001              | Peak expiratory flow               | -0.014              |
| Mother with COPD                             | 0.013               | Pi10 (square root of WA)            | -0.001              | ATS/ERS classification             | -0.015              |
| Father with asthma                           | 0.012               | Smokes cigars regularly             | -0.001              | Resting SaO2                       | -0.016              |
| Father with chronic Bronchitis               | 0.012               | Smokes pipe regularly               | -0.001              | Reticular abnormality CT           | -0.016              |
| Mother with chronic                          | 0.011               | Rheumatoid arthritis                | -0.002              | Oxygen used on 6 m walk            | -0.018              |
|                                              |                     | Concerns of                         | -0.002              | Father with lung cancer            | -0.018              |
|                                              |                     |                                     |                     | SGRQ (active)                      | -0.02               |
|                                              |                     |                                     |                     | Pre BD PEF                         | -0.021              |
|                                              |                     |                                     |                     | Pre BD FVC                         | -0.03               |
|                                              |                     |                                     |                     | Angioplasty                        | -0.03               |
|                                              |                     |                                     |                     | Dyspnea limiting walking           | -0.03               |

| Variable Name         | Variable importance | Variable Name         | Variable importance | Variable Name                | Variable importance |
|-----------------------|---------------------|-----------------------|---------------------|------------------------------|---------------------|
| WA% (segmental)       | -0.031              | Emphysema (upper 1/3) | -0.064              | Emphysema (upper 1/3)        | -0.086              |
| Emphysema (%)         | -0.037              | BMI                   | -0.071              | FEV <sub>1</sub>             | -0.092              |
| MMRC dyspnea score    | -0.038              | SGRQ (impact)         | -0.071              | Pre BD FEF 25/75             | -0.101              |
| Change in FVC post BD | -0.048              | FEF 25/75 post BD     | -0.078              | FEV <sub>1</sub> pre BD      | -0.104              |
| %change FVC post BD   | -0.048              | FEV <sub>1</sub> /FVC | -0.08               | Pre BD FEV <sub>1</sub> /FVC | -0.134              |
| Weight                | -0.054              | Upper/lower emphysema | -0.081              |                              |                     |
| Gas trapping on CT    | -0.06               | SGRQ (total)          | -0.082              |                              |                     |

BD: bronchodilator; SGRQ:(St. George's Respiratory Questionnaire); PEF: peak expiratory flow; FVC: forced vital capacity; FEV<sub>1</sub>: forced expiratory volume at 1 second; WA: wall area on CT;

**e-Table 2:** Univariable associations with acute episodes of respiratory disease frequency 12 months prior to enrollment

| Risk Factor                    | Negative Binomial |             |        | Zero Model |           |        |
|--------------------------------|-------------------|-------------|--------|------------|-----------|--------|
|                                | Estimate          | SE          | P      | Estimate   | SE        | P      |
| Age at enrollment              | -0.002063         | 0.004676    | 0.6590 | -0.142376  | 0.048014  | 0.0030 |
| Gender (female)                | 0.007452          | 0.079085    | 0.9249 | 1.098272   | 0.548693  | 0.0453 |
| Race (NHW)                     | -0.049916         | 0.095704    | 0.6020 | -1.046209  | 0.409298  | 0.0106 |
| GERD                           | -0.212289         | 0.079241    | 0.0074 | 2.206574   | 2.007017  | 0.2716 |
| CAD                            | -0.009484         | 0.104702    | 0.9278 | 1.901872   | 2.206111  | 0.3886 |
| CHF                            | -0.388110         | 0.137490    | 0.0048 | 18.938039  | 0.116097  | <.0001 |
| Current smoker                 | 0.230205          | 0.081148    | 0.0046 | -0.640178  | 0.292653  | 0.0287 |
| ATS pack years                 | 0.001480          | 0.001403    | 0.2917 | -0.045439  | 0.012979  | 0.0005 |
| 6 min walk with O <sub>2</sub> | -0.438017         | 0.073059    | <.0001 | 22.380420  | 0.046925  | <.0001 |
| Chronic bronchitis             | -0.407711         | 0.080057    | <.0001 | 2.692825   | 2.786145  | 0.3338 |
| History of asthma              | -0.296329         | 0.122025    | 0.0152 | 2.683252   | 2.124752  | 0.2066 |
| Parent with COPD               | -0.178017         | 0.093734    | 0.0575 | 3.917705   | 15.628784 | 0.8021 |
| Supplemental O <sub>2</sub>    | -0.438017         | 0.073059    | <.0001 | 22.380420  | 0.046925  | <.0001 |
| BP (systolic)                  | -0.004154         | 0.002309    | 0.0720 | -0.000957  | 0.005971  | 0.8726 |
| BP (diastolic)                 | -0.005178         | 0.003410    | 0.1289 | 0.022456   | 0.011093  | 0.0429 |
| Heart rate                     | 0.009235          | 0.002820    | 0.0011 | -0.040516  | 0.009849  | <.0001 |
| BMI                            | 0.004488          | 0.004928    | 0.3625 | -0.013050  | 0.011623  | 0.2615 |
| 6 minute walk                  | -0.000465         | 0.000092721 | <.0001 | 0.002617   | 0.000264  | <.0001 |
| FEV <sub>1</sub>               | -0.010408         | 0.001337    | <.0001 | 0.044956   | 0.002899  | <.0001 |
| FEV <sub>1</sub> /FVC          | -1.188362         | 0.187060    | <.0001 | 6.990424   | 0.501006  | <.0001 |
| BDR                            | -0.013018         | 0.083014    | 0.8754 | 17.014059  | 0.082823  | <.0001 |
| BODE                           | 0.151846          | 0.017379    | <.0001 | -1.045358  | 0.095608  | <.0001 |
| MMRC                           | 0.260451          | 0.028110    | <.0001 | -0.988874  | 0.118842  | <.0001 |
| SGRQ (total)                   | 0.019799          | 0.001724    | <.0001 | -0.078528  | 0.006519  | <.0001 |
| Emphysema (%)                  | 0.008658          | 0.002603    | 0.0009 | -0.131201  | 0.014576  | <.0001 |

| Risk Factor        | Negative Binomial |          |        | Zero Model |          |        |
|--------------------|-------------------|----------|--------|------------|----------|--------|
|                    | Estimate          | SE       | P      | Estimate   | SE       | P      |
| gas trapping (%)   | 0.006801          | 0.001620 | <.0001 | -0.048072  | 0.004621 | <.0001 |
| TLC (%)            | 0.007471          | 0.001971 | 0.0002 | -0.020808  | 0.003737 | <.0001 |
| Pi10               | 0.875251          | 0.265725 | 0.0010 | -5.684710  | 0.676708 | <.0001 |
| WA% (segmental)    | 0.035231          | 0.011877 | 0.0030 | -0.272665  | 0.033964 | <.0001 |
| WA% (subsegmental) | 0.041324          | 0.021976 | 0.0601 | -0.424565  | 0.062523 | <.0001 |
| PA (mm)            | 0.013531          | 0.008968 | 0.1313 | -0.028886  | 0.022015 | 0.1895 |
| Ao (mm)            | -0.003465         | 0.014415 | 0.8100 | 0.016866   | 0.044500 | 0.7047 |
| PA/Ao              | 0.528598          | 0.322090 | 0.1008 | -1.270474  | 0.811970 | 0.1177 |

SE: standard error; NHW: non-Hispanic White; GERD: gastroesophageal reflux; CAD: coronary artery disease; CHF: congestive heart failure; BP: blood pressure; BMI: body mass index FEV<sub>1</sub>: forced expiratory volume at 1 second;; FVC: forced vital capacity; FEV1: BDR: bronchodilator responsiveness; MMRC: Modified Medical Research Council dyspnea score; SGRQ:(St. George's Respiratory Questionnaire); TLC: total lung capacity; Pi10 (square root of wall area percent for 10 µm airway; WA% wall area %; PA: pulmonary artery; Ao: aorta



**e-Table 3:** Univariable associations with hospitalizations for acute episodes of respiratory disease in 12 months prior to enrollment

| RiskFactor                     | Negative Binomial |          |        | Zero Model |            |        |
|--------------------------------|-------------------|----------|--------|------------|------------|--------|
|                                | Estimate          | StdErr   | Probt  | Inf_Est    | Inf_Error  | Inf_P  |
| Age at enrollment              | 0.013681          | 0.006140 | 0.0259 | 0.771384   | 0.530673   | 0.1461 |
| Gender (femal)                 | 0.068063          | 0.184686 | 0.7125 | 17.574720  | 0.885842   | <.0001 |
| Race (NHW)                     | -0.231853         | 0.108365 | 0.0324 | 1.879511   | .          | .      |
| GERD                           | -0.098212         | 0.191598 | 0.6082 | 18.177062  | 0.333609   | <.0001 |
| CAD                            | -0.248083         | 0.220633 | 0.2608 | 18.510602  | 0.312956   | <.0001 |
| CHF                            | -0.797402         | 0.246703 | 0.0012 | 21.241856  | 0.172784   | <.0001 |
| Current smoker                 | 0.154249          | 0.192241 | 0.4223 | -16.481721 | .          | .      |
| ATS pack years                 | 0.004228          | 0.002617 | 0.1062 | -0.032141  | 0.012903   | 0.0127 |
| 6 min walk with O <sub>2</sub> | -0.238233         | 0.166605 | 0.1527 | 22.885925  | 0.089201   | <.0001 |
| Chronic bronchitis             | -0.491576         | 0.190875 | 0.0100 | 19.370001  | 0.266717   | <.0001 |
| History of asthma              | -0.506666         | 0.304024 | 0.0956 | 0.753054   | 0.634052   | 0.2350 |
| Parent with COPD               | 0.105878          | 0.211768 | 0.6171 | 16.803944  | 0.182431   | <.0001 |
| Supplemental O <sub>2</sub>    | -0.238233         | 0.166605 | 0.1527 | 22.885925  | 0.089201   | <.0001 |
| BP (systolic)                  | -0.000270         | 0.003739 | 0.9424 | 0.129826   | 0.086315   | 0.1326 |
| BP (diastolic)                 | -0.006130         | 0.007529 | 0.4155 | 0.044913   | 0.078031   | 0.5649 |
| Heart rate                     | 0.012699          | 0.006216 | 0.0410 | -0.050437  | 0.010418   | <.0001 |
| BMI                            | 0.009574          | .        | .      | -0.010093  | 171.659494 | 1.0000 |
| 6 min walk (ft)                | -0.000896         | 0.000235 | 0.0001 | 0.003307   | 0.000431   | <.0001 |
| FEV <sub>1</sub>               | -0.008395         | 0.003269 | 0.0102 | 0.052157   | 0.004948   | <.0001 |
| FEV1_FVC_utah                  | -0.760115         | 0.444981 | 0.0876 | 7.069481   | 0.781050   | <.0001 |
| BDR 0                          | -0.223785         | 0.190728 | 0.2407 | 18.664741  | 0.235369   | <.0001 |
| BODE                           | 0.238619          | 0.046558 | <.0001 | -1.215301  | 0.196447   | <.0001 |
| MMRC                           | 0.544481          | 0.091881 | <.0001 | -1.044378  | 0.297948   | 0.0005 |
| SGRQ (total)                   | 0.035160          | 0.004855 | <.0001 | -0.111606  | 0.024041   | <.0001 |
| %emphysea                      | 0.008499          | 0.005788 | 0.1420 | -0.107637  | 0.019454   | <.0001 |

|                    | Negative Binomial |          |        | Zero Model |           |        |
|--------------------|-------------------|----------|--------|------------|-----------|--------|
| RiskFactor         | Estimate          | StdErr   | Probt  | Inf_Est    | Inf_Error | Inf_P  |
| %gas trapping      | 0.003737          | 0.003731 | 0.3165 | -0.048691  | 0.007176  | <.0001 |
| TLC (%)            | 0.009861          | 0.004691 | 0.0356 | -0.013681  | 0.008553  | 0.1097 |
| Pi10               | 1.434824          | 0.580837 | 0.0135 | -6.685049  | 0.992454  | <.0001 |
| WA% (segmental)    | 0.072145          | 0.030026 | 0.0163 | -0.316360  | 0.060134  | <.0001 |
| WA% (subsegmental) | 0.122448          | 0.053545 | 0.0222 | -0.915138  | 0.256028  | 0.0004 |
| PA (mm)            | 0.057920          | 0.022735 | 0.0108 | -0.062984  | 0.053902  | 0.2426 |
| Ao (mm)            | 0.017803          | 0.022105 | 0.4206 | 0.370665   | 0.228313  | 0.1045 |
| PA/Ao              | 1.800229          | 0.787941 | 0.0223 | -2.593733  | 1.998740  | 0.1944 |

SE: standard error; NHW: non-Hispanic White; GERD: gastroesophageal reflux; CAD: coronary artery disease; CHF: congestive heart failure; BP: blood pressure; BMI: body mass index FEV<sub>1</sub>: forced expiratory volume at 1 second;; FVC: forced vital capacity; FEV1: BDR: bronchodilator responsiveness; MMRC: Modified Medical Research Council dyspnea score; SGRQ:(St. George's Respiratory Questionnaire); TLC: total lung capacity; Pi10 (square root of wall area percent for 10 µm airway; WA% wall area %; PA: pulmonary artery; Ao: aorta

**e-Table 4:** Annual rate of hospitalization for acute episodes of respiratory disease (actual rates)

| Score | Control            | GOLD U            | COPD<br>GOLD 1,2,3,4 |
|-------|--------------------|-------------------|----------------------|
| 0-2   | 0.01 ± 0.10 (1020) |                   | 0 ± 0 (100)          |
| 2-4   | 0.04 ± 0.27 (1489) | 0.03 ± 0.19 (306) | 0.02 ± 0.11 (619)    |
| 4-6   | 0.09 ± 0.47 (523)  | 0.06 ± 0.24 (256) | 0.07 ± 0.28 (637)    |
| 6-8   | 0.12 ± 0.57 (268)  | 0.08 ± 0.33 (192) | 0.12 ± 0.39 (701)    |
| 8-10  | 0.48 ± 1.11 (102)  | 0.12 ± 0.41 (116) | 0.21 ± 0.57 (678)    |
| 10-12 | 0.34 ± 0.74 (26)   | 0.40 ± 0.71 (81)  | 0.31 ± 0.82 (556)    |
| 12-14 |                    | 0.55 ± 1.17 (35)  | 0.56 ± 1.08 (292)    |
| >14   |                    |                   | 0.80 ± 1.34 (220)    |

means ± standard deviation (#subjects per group; min. 25 subjects per group)
